# Supplementary material for: Piloting the Virtual PLAYshop Program: A Parent-Focused Physical Literacy Intervention for Early Childhood
Source: MDPI journal article supplement (doi:10.3390/children10040720), 2023-04-13
Supplement: s1 [file s1]

# Supplementary file 1. Results of missing values analyses

| Variables at all time points<br>(baseline, post-workshop, 2-month follow-up) | Results of Little's missing<br>completely at random test | Overall summary of missing values |                 |
|------------------------------------------------------------------------------|----------------------------------------------------------|-----------------------------------|-----------------|
|                                                                              |                                                          | Cases<br>% (n)                    | Values<br>% (n) |
| <b>All variables</b>                                                         | $\chi^2=8.660$ , $df=1,092$ , $p=1.000$                  | 30.00 (9)                         | 0.33 (15)       |
| <b>Parental capability</b>                                                   |                                                          |                                   |                 |
| Parental knowledge                                                           | $\chi^2=56.958$ , $df=51$ , $p=0.263$                    | 6.67 (2)                          | 0.37 (3)        |
| <b>Parental opportunity</b>                                                  |                                                          |                                   |                 |
| Parental perceived availability of resources                                 | <i>no missing values</i>                                 |                                   |                 |
| Parental perceived barriers                                                  | $\chi^2=16.677$ , $df=14$ , $p=0.274$                    | 3.33 (1)                          | 0.22 (1)        |
| <b>Parental motivation</b>                                                   |                                                          |                                   |                 |
| Parental confidence                                                          | $\chi^2=108.259$ , $df=127$ , $p=0.884$                  | 13.33 (4)                         | 0.51 (5)        |
| Parental beliefs                                                             | $\chi^2=16.044$ , $df=11$ , $p=0.140$                    | 3.33 (1)                          | 0.28 (1)        |
| Parental outcome expectations                                                | $\chi^2=4.148$ , $df=16$ , $p=0.999$                     | 6.67 (2)                          | 0.74 (2)        |
| <b>Other</b>                                                                 |                                                          |                                   |                 |
| Parental physical activity modeling                                          | $\chi^2=3.021$ , $df=8$ , $p=0.933$                      | 3.33 (1)                          | 0.37 (1)        |
| Parent-child co-participation in physical activity                           | $\chi^2=30.848$ , $df=22$ , $p=0.099$                    | 6.67 (2)                          | 0.56 (2)        |
